# Supplementary material for: Impact of NO x and OH on secondary organic aerosol (SOA) formation from β-pinene photooxidation
Source: Copernicus journal article supplement (doi:10.5194/acp-2016-336), 2016-04-27
Supplement: Supplementary file [file acp-2016-336-RC2-supplement.pdf]

Review of “Impact of NO<sub>x</sub> and OH on secondary organic aerosol (SOA) formation from β-pinene photooxidation” by Sarrafzadeh et al.

This manuscript studied the effects of NO<sub>x</sub> and OH concentration on SOA yield from β-pinene photooxidation based on well-designed laboratory chamber experiments. By adjusting the j(O<sub>1</sub>D), the authors successfully investigated the individual effect of NO<sub>x</sub> on SOA yield. The authors showed that the SOA yield from β-pinene photooxidation decreases with increasing NO<sub>x</sub> while the OH concentration is kept constant. This offers one possible explanation to previously reported non-linear dependence of SOA yield on NO<sub>x</sub> level. This is an important study on the effects of NO<sub>x</sub> on SOA formation. However, some discussions in the manuscript are confusing and require clarification. I recommend accepting manuscript after major revisions.

Major comments.

1. Clarification of NO<sub>x</sub> effects are required.

As stated in the manuscript, NO<sub>x</sub> can affect SOA yield through various mechanisms (i.e., affect OH concentration, affect RO<sub>2</sub> fate, affect new particle formation, etc). However, the term “NO<sub>x</sub> effect” is not well-defined and causes confusions in the manuscript. In the manuscript, the impacts of NO<sub>x</sub> on SOA yield through influencing OH concentration sometimes is treated as NO<sub>x</sub> effects, but sometimes is not. For example, Page 2 Line 15 stated that “NO<sub>x</sub> dependencies vary for different NO<sub>x</sub> conditions”, which implies that the effect of OH is treated as part of NO<sub>x</sub> effects. However, Page 2 Line 19-21 stated that “After eliminating the effect of NO<sub>x</sub> induced changes of OH concentrations, the overall effect of NO<sub>x</sub> on SOA yield was moderate”, where the effect of OH is not treated as part of overall NO<sub>x</sub> effects. In order to clarify the discussion, I suggest the authors to use “direct effect of NO<sub>x</sub>” (i.e., effect of NO<sub>x</sub> on RO<sub>2</sub> fate) and “indirect effect of NO<sub>x</sub>” (i.e., effect of NO<sub>x</sub> through influencing OH concentration). Terms “direct effect” and “indirect effect” will be used in the following comments.

2. Are the results in the manuscript helpful to models?

In real atmosphere, if the NO<sub>x</sub> concentration changes, the SOA yield will change as a result of both direct and indirect effects of NO<sub>x</sub>. In atmospheric models, which have explicit radical chemistry (like MCM mechanism), the direct and indirect effects of NO<sub>x</sub> have already been treated separately. In atmospheric models, which do not explicitly treat the RO<sub>2</sub> fate (like global models),

the non-linear dependence of SOA yield on NO<sub>x</sub> is preferable, because it includes the overall (both direct and indirect) effects of NO<sub>x</sub>. Thus, the results in this study are seemingly not helpful for models. In another words, what suggestions could this study provide to models and how do the authors suggest models to treat the NO<sub>x</sub> effects on SOA yield?

### 3. Expand the discussion on the effect of NO<sub>x</sub> on RO<sub>2</sub> fate.

After eliminating the effect of NO<sub>x</sub> on NPF and OH concentration, the observation that SOA yield decreases with increasing NO<sub>x</sub> concentration is caused by NO<sub>x</sub> effect on RO<sub>2</sub> fate. The authors should expand the discussion on this direct effect of NO<sub>x</sub> on SOA yield. Also, the authors should comment on why the direct effect of NO<sub>x</sub> only has a moderate influence on SOA yield. Is this observation surprising since that the products from RO<sub>2</sub>+HO<sub>2</sub> and RO<sub>2</sub>+NO<sub>x</sub> are quite different?

Also, the manuscript treated the NO<sub>x</sub>-induced suppression of NPF as a separate effect of NO<sub>x</sub>. However, the suppression of NPF is just a reflection of the NO<sub>x</sub> effect on RO<sub>2</sub> fate and oxidation products. Thus, the suppression of NPF should not be considered as a separate effect.

### 4. The effect of OH concentration on SOA yield.

Previous studies have investigated the effects of OH exposure (or oxidation extent) on SOA yield (Song et al., 2007; Chan et al., 2007; Healy et al., 2009). For example, Eddingsaas et al. (2012) clearly showed that the SOA yield from  $\alpha$ -pinene photooxidation is a function of OH exposure. However, previous studies on the effect of OH concentration on SOA yield are not properly cited in the manuscript. Section 3.1.1 is not novel.

Many previous studies have realized the confounding effect of OH concentration when studying the effects of NO<sub>x</sub> on SOA yield. For example, Xu et al. (2014) reported the SOA yield of isoprene photooxidation, which is calculated under the same OH exposure, as a function of NO<sub>x</sub> level. Xu et al. (2014) showed that the SOA yield from isoprene photooxidation has a non-linear dependence on NO<sub>x</sub> while the OH exposure is kept constant. It is clearly that the direct effect of NO<sub>x</sub> on SOA yield depends on VOCs.

There are two ways to isolate the effect of OH exposure. One is holding both OH concentration and oxidation time constant as done in this study. The other one is to vary both OH concentration and oxidation time but keep the OH exposure constant as done in Xu et al. (2014). Can the authors conduct experiments to examine if these two methods result in the same conclusion regarding the direct effect of NO<sub>x</sub> on SOA yield? For example, in order to achieve the same OH exposure under

different NO<sub>x</sub> levels, the authors can hold  $j(O1D)$  constant and adjust the residence time in the reactor.

5. I have serious concerns about the wall loss correction in this manuscript.

Firstly, the wall loss correction algorithm is derived from the loss rate of gas HOMs, but is applied to correct particle masses. This correction is not appropriate considering that HOMs only account for a small mass fraction of total OA concentration (Ehn et al., 2014) and that wall loss rate of HOMs and particles are different. In the SI, the authors briefly mentioned that the wall loss rate of 50-150nm particles is negligible compared to the losses of HOMs. However, the authors should be more quantitative when comparing the rates, instead of only citing Mentel et al. (2009). Although the particle wall loss rate is smaller than HOMs, the mass concentration loss caused by particle wall loss could be orders of magnitude larger than that caused by HOMs wall loss. In another word, in order to justify the wall loss correction applied in the manuscript, the authors need to verify that the mass concentration loss caused by particle wall loss is negligible compared to that caused by HOMs wall loss. Comparing wall loss rate is not enough. In the SI, the authors assume that the  $F_p$  is the same between HOMs and semi-volatile species. The authors need to justify this assumption. Many previous studies have investigated the vapor wall loss (Krechmer et al., 2016; Zhang et al., 2014; McVay et al., 2016; Nah et al., 2016), but none of them are cited in the manuscript.

Secondly, the description of wall loss correction methods needs to be expanded and clarified. To name a few,

- (1) Although the procedures to calculate incremental yields have been described in Mentel et al. (2009), it is helpful to explain “incremental yields” and the calculation procedure in the manuscript.
- (2) Although the wall loss correction procedure has been discussed in the SI, it is helpful to elaborate the discussion in the main text. Especially, how is the correction factor applied to particle mass? Do the authors consider the particle size distribution when apply the correction factor, since the particles with different size has different wall loss rate (Loza et al., 2012).
- (3) It is not clear how the authors obtain and apply only one  $F_p$  vs particle surface area curve for the correction (Figure S5), since different HOMs have different  $F_p$  (Figure S3),
- (4) Page 7 Line 20. Why is the procedure only valid for the chamber used in this study?
- (5) Page 7 Line 22. Which wall loss correction method does the word “above” refer to?

Thirdly, are HOMs produced under high-NO<sub>x</sub> conditions? If not, how is the wall loss correction factor obtained for high-NO<sub>x</sub> experiments?

6. Section 3.2 needs better organization and clarification.

Firstly, in this study, the role of NO/NO<sub>2</sub> ratio in SOA formation is just a reflection of the effect of OH concentration. This needs to be clearly stated, because NO/NO<sub>2</sub> ratio can affect SOA formation through other mechanisms. For example, the NO/NO<sub>2</sub> ratio can affect RO<sub>2</sub> fate and oxidation products (Chan et al., 2010). In fact, section 3.2 can be merged with section 3.1 since section 3.2 still probes the effect of OH concentration, but from another aspect.

Secondly, in section 3.2, the role of NO/NO<sub>2</sub> is probed by comparing high O<sub>3</sub> and low O<sub>3</sub> experiments (figure 5 vs 7 and figure 4 vs 6), instead of within one single figure. This comparison should be clearly stated in the manuscript to avoid confusion. For example, add “by comparing figure 5 and figure 7” in Page 14 Line 11. Also, can the authors merge figure 7 with figure 5 and merge figure 6 with figure 4 to facilitate the comparison?

Thirdly, under the same O<sub>3</sub> concentration (i.e., figure 5), does the NO/NO<sub>2</sub> ratio change with NO<sub>x</sub> level? Is it possible that the moderate direction effect of NO<sub>x</sub> on SOA yield is confounded by the varying NO/NO<sub>2</sub> ratio at different NO<sub>x</sub> level? Can the authors add the NO/NO<sub>2</sub> ratio as a third x-axis in the figures? The authors can potentially probe the effect of NO/NO<sub>2</sub> ratio on SOA yield through affecting the RO<sub>2</sub> fate.

Fourthly, in order to justify that the NO/NO<sub>2</sub> ratio changes with adjusting O<sub>3</sub>, the author could simply show the NO/NO<sub>2</sub> ratio for high low O<sub>3</sub> and high O<sub>3</sub> experiments. If the authors want to theoretically prove the argument, the authors need to justify how the reaction of NO with RO<sub>2</sub> can be neglected (Page 14 Line 3).

7. Experiments in the presence of seed aerosol (section 3.4)

The fundamental reason for enhanced SOA yield by adding seed is that seed particles reduce the vapor wall loss. In fact, the lower SOA yield without seed emphasizes the uncertainties/errors in wall loss correction procedures. Thus, the authors should expand the discussion on the wall loss correction uncertainties/errors (i.e., my comment #5). The authors should also comment on why adding seed has larger effect on high-NO<sub>x</sub> conditions than low-NO<sub>x</sub> conditions.

## Minor Comments.

1. Figure 3. Why does the particle mass have a linear relationship with consumed  $\beta$ -pinene? In another word, why is the SOA yield constant and independent on  $\Delta Mo$ ? This contradicts previous studies (Ng et al., 2006; Griffin et al., 1999).
2. Page 2 Line 4. Please change it to “we found increases of SOA yields with increasing NO<sub>x</sub> as low NO<sub>x</sub> conditions.”
3. Page 2 Line 13. Remove the semi-colon after “both”.
4. Page 2 Line 22. Add the discussion why a-p SOA yield decreases with increasing NO<sub>x</sub>. To avoid confusion.
5. Page 3 Line 21. The dependence of SOA yield on NO<sub>x</sub> level is different for different VOCs. For larger VOCs, such as sesquiterpenes, SOA yields are largest at high NO<sub>x</sub> levels (Ng et al., 2007; Kroll and Seinfeld, 2008).
6. Page 4 Line 7. It is not right to state that “organic nitrates are suggested to be relatively volatile...” According to the SIMPOL model (Pankow and Asher, 2008), nitrate functionality can reduce the molecule volatility by the similar magnitude as hydroxyl functionality and hydroperoxide functionality.
7. Page 5 Line 17-18. It is very nice to adjust  $j(O1D)$  to adjust  $[OH]$ . Please comment on how the adjustment would affect the photolysis of other species.
8. Page 8 Line 2-7. Why is SOA yield determined by the oxidation rate of the BVOC? Eq. (3) seems straightforward.
9. Page 8 Line 14. Why is the low-NO<sub>x</sub> condition defined as  $[NO_x]_0 < 30 \text{ ppb}$  and  $[BVOC]_0 / [NO_x]_0 > 10$ ?
10. Page 10 Line 4. Please cite Xu et al. (2014) who studied the effects of NO<sub>x</sub> on isoprene SOA yield.
11. Page 10 Line 12. Add “from isoprene” after the word “yield”.
12. Page 10 Line 17. It is true that the RO<sub>2</sub> fate changes over the course of experiments in many previous studies, which run the chamber in the batch mode. Is the batch mode or CSTR mode more representative of real atmosphere?
13. Page 12 Line 8. Could be more explicit/quantitative about  $\beta$ -pinene+OH rate vs nopinone+OH rate.

14. Page 12 Line 17. The formation of ELVOCs is mainly from isomerization. Its formation only requires one OH reaction to initiate the reaction (Ehn et al., 2014).

15. Page 15 Line 10-12. Does it mean the direct effect of NO<sub>x</sub> on SOA yield is related to OH concentration? If the O<sub>3</sub> concentration is even higher, will the decrease in SOA yield become smaller? Why?

16. Page 16 Line 1-2. Why did the authors conclude that “no particle formation at all was observed when [NO<sub>x</sub>]<sub>0</sub> was above 60ppb”? The SOA yield is about 5% when NO<sub>x</sub> was above 60ppb as shown in Figure 8. Also, in the caption of Figure 8, why is the x-axis not comparable even if α-pinene concentrations are lower?

17. Page 16 Line 15-16. Will the authors observe similar trends between α-pinene and β-pinene systems if the OH concentration is the same?

18. Page 19 Line 9. This sentence could be rephrased to something like “the non-linear dependence of SOA yield on NO<sub>x</sub> reported in previous studies is due to differing OH concentration.”

19. Page 19 Line 10. The mechanism for [OH] dependence has been probed in previous studies (Chan et al., 2007), which should be discussed in the manuscript.

## Reference

Chan, A. W. H., Kroll, J. H., Ng, N. L., and Seinfeld, J. H.: Kinetic modeling of secondary organic aerosol formation: effects of particle- and gas-phase reactions of semivolatile products, *Atmos Chem Phys*, 7, 4135-4147, 2007.

Chan, A. W. H., Chan, M. N., Surratt, J. D., Chhabra, P. S., Loza, C. L., Crouse, J. D., Yee, L. D., Flagan, R. C., Wennberg, P. O., and Seinfeld, J. H.: Role of aldehyde chemistry and NOx concentrations in secondary organic aerosol formation, *Atmos Chem Phys*, 10, 7169-7188, DOI 10.5194/acp-10-7169-2010, 2010.

Eddingsaas, N. C., Loza, C. L., Yee, L. D., Chan, M., Schilling, K. A., Chhabra, P. S., Seinfeld, J. H., and Wennberg, P. O.:  $\alpha$ -pinene photooxidation under controlled chemical conditions &ndash; Part 2: SOA yield and composition in low- and high-NOx environments, *Atmos. Chem. Phys.*, 12, 7413-7427, 10.5194/acp-12-7413-2012, 2012.

Ehn, M., Thornton, J. A., Kleist, E., Sipila, M., Junninen, H., Pullinen, I., Springer, M., Rubach, F., Tillmann, R., Lee, B., Lopez-Hilfiker, F., Andres, S., Acir, I.-H., Rissanen, M., Jokinen, T., Schobesberger, S., Kangasluoma, J., Kontkanen, J., Nieminen, T., Kurten, T., Nielsen, L. B., Jorgensen, S., Kjaergaard, H. G., Canagaratna, M., Maso, M. D., Berndt, T., Petaja, T., Wahner, A., Kerminen, V.-M., Kulmala, M., Worsnop, D. R., Wildt, J., and Mentel, T. F.: A large source of low-volatility secondary organic aerosol, *Nature*, 506, 476-479, 10.1038/nature13032, 2014.

Griffin, R. J., Cocker, D. R., Flagan, R. C., and Seinfeld, J. H.: Organic aerosol formation from the oxidation of biogenic hydrocarbons, *J Geophys Res-Atmos*, 104, 3555-3567, Doi 10.1029/1998jd100049, 1999.

Healy, R. M., Temime, B., Kuprovskyyte, K., and Wenger, J. C.: Effect of Relative Humidity on Gas/Particle Partitioning and Aerosol Mass Yield in the Photooxidation of p-Xylene, *Environ Sci Technol*, 43, 1884-1889, 10.1021/es802404z, 2009.

Krechmer, J. E., Pagonis, D., Ziemann, P. J., and Jimenez, J. L.: Quantification of Gas-Wall Partitioning in Teflon Environmental Chambers Using Rapid Bursts of Low-Volatility Oxidized Species Generated in Situ, *Environ Sci Technol*, 10.1021/acs.est.6b00606, 2016.

Kroll, J. H., and Seinfeld, J. H.: Chemistry of secondary organic aerosol: Formation and evolution of low-volatility organics in the atmosphere, *Atmospheric Environment*, 42, 3593-3624, DOI 10.1016/j.atmosenv.2008.01.003, 2008.

Loza, C. L., Chhabra, P. S., Yee, L. D., Craven, J. S., Flagan, R. C., and Seinfeld, J. H.: Chemical aging of m-xylene secondary organic aerosol: laboratory chamber study, *Atmos Chem Phys*, 12, 151-167, DOI 10.5194/acp-12-151-2012, 2012.

McVay, R. C., Zhang, X., Aumont, B., Valorso, R., Camredon, M., La, Y. S., Wennberg, P. O., and Seinfeld, J. H.: SOA formation from the photooxidation of  $\alpha$ -pinene: systematic exploration

of the simulation of chamber data, *Atmos. Chem. Phys.*, 16, 2785-2802, 10.5194/acp-16-2785-2016, 2016.

Mentel, T. F., Wildt, J., Kiendler-Scharr, A., Kleist, E., Tillmann, R., Dal Maso, M., Fisseha, R., Hohaus, T., Spahn, H., Uerlings, R., Wegener, R., Griffiths, P. T., Dinar, E., Rudich, Y., and Wahner, A.: Photochemical production of aerosols from real plant emissions, *Atmos. Chem. Phys.*, 9, 4387-4406, 10.5194/acp-9-4387-2009, 2009.

Nah, T., McVay, R. C., Zhang, X., Boyd, C. M., Seinfeld, J. H., and Ng, N. L.: Influence of Seed Aerosol Surface Area and Oxidation Rate on Vapor-Wall Deposition and SOA Mass Yields: A case study with  $\alpha$ -pinene Ozonolysis, *Atmos. Chem. Phys. Discuss.*, 2016, 1-45, 10.5194/acp-2016-269, 2016.

Ng, N. L., Kroll, J. H., Keywood, M. D., Bahreini, R., Varutbangkul, V., Flagan, R. C., Seinfeld, J. H., Lee, A., and Goldstein, A. H.: Contribution of first- versus second-generation products to secondary organic aerosols formed in the oxidation of biogenic hydrocarbons, *Environ Sci Technol*, 40, 2283-2297, Doi 10.1021/Es052269u, 2006.

Ng, N. L., Chhabra, P. S., Chan, A. W. H., Surratt, J. D., Kroll, J. H., Kwan, A. J., McCabe, D. C., Wennberg, P. O., Sorooshian, A., Murphy, S. M., Dalleska, N. F., Flagan, R. C., and Seinfeld, J. H.: Effect of NO(x) level on secondary organic aerosol (SOA) formation from the photooxidation of terpenes, *Atmos Chem Phys*, 7, 5159-5174, 2007.

Pankow, J. F., and Asher, W. E.: SIMPOL.1: a simple group contribution method for predicting vapor pressures and enthalpies of vaporization of multifunctional organic compounds, *Atmos Chem Phys*, 8, 2773-2796, 2008.

Song, C., Na, K., Warren, B., Malloy, Q., and Cocker, D. R.: Impact of propene on secondary organic aerosol formation from m-xylene, *Environ Sci Technol*, 41, 6990-6995, Doi 10.1021/Es062279a, 2007.

Xu, L., Kollman, M. S., Song, C., Shilling, J. E., and Ng, N. L.: Effects of NO<sub>x</sub> on the Volatility of Secondary Organic Aerosol from Isoprene Photooxidation, *Environ Sci Technol*, 48, 2253-2262, 10.1021/es404842g, 2014.

Zhang, X., Cappa, C. D., Jathar, S. H., McVay, R. C., Ensberg, J. J., Kleeman, M. J., and Seinfeld, J. H.: Influence of vapor wall loss in laboratory chambers on yields of secondary organic aerosol, *Proceedings of the National Academy of Sciences*, 10.1073/pnas.1404727111, 2014.
